# Supplementary material
Source: Springer Nature journal article supplement (https://www.springermedizin.de/resource/supplementary/12913_2011_1985_MOESM1_ESM.pdf/9530238)
Supplement: MOESM1 [file 9530238]

Mapping according to reports  
from bar owners (N=456)

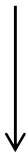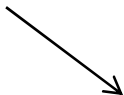

Missing on the day of interview  
(n=33)

Available on the day of interview  
According to report from bar owner  
(N=423)

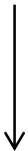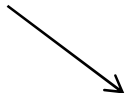

Declined to participate (n=7)  
Incomplete interview (n=9)

Actual interview  
(N=407)
